# Supplementary material for: Loss of Fer Jeopardizes Metabolic Plasticity and Mitochondrial Homeostasis in Lung and Breast Carcinoma Cells
Source: Int J Mol Sci. 2021 Mar 25;22(7):3387. doi: 10.3390/ijms22073387 (PMC8037256; doi:10.3390/ijms22073387)
Supplement: Supplementary file 1 [file ijms-22-03387-s001.zip]

Archive with 4 entries (4 files):
- Supplementary Material.pdf
- Figure S1 17-03-21tif.tif
- Figure S2 17-03-21.tif
- Figure S3 17-03.tif
