# Supplementary material for: Loss of Fer Jeopardizes Metabolic Plasticity and Mitochondrial Homeostasis in Lung and Breast Carcinoma Cells
Source: Int J Mol Sci. 2021 Mar 25;22(7):3387. doi: 10.3390/ijms22073387 (PMC8037256; doi:10.3390/ijms22073387)
Supplement: Supplementary file 1 [file ijms-22-03387-s001.zip › Supplementary Material.pdf]

Supplementary Material

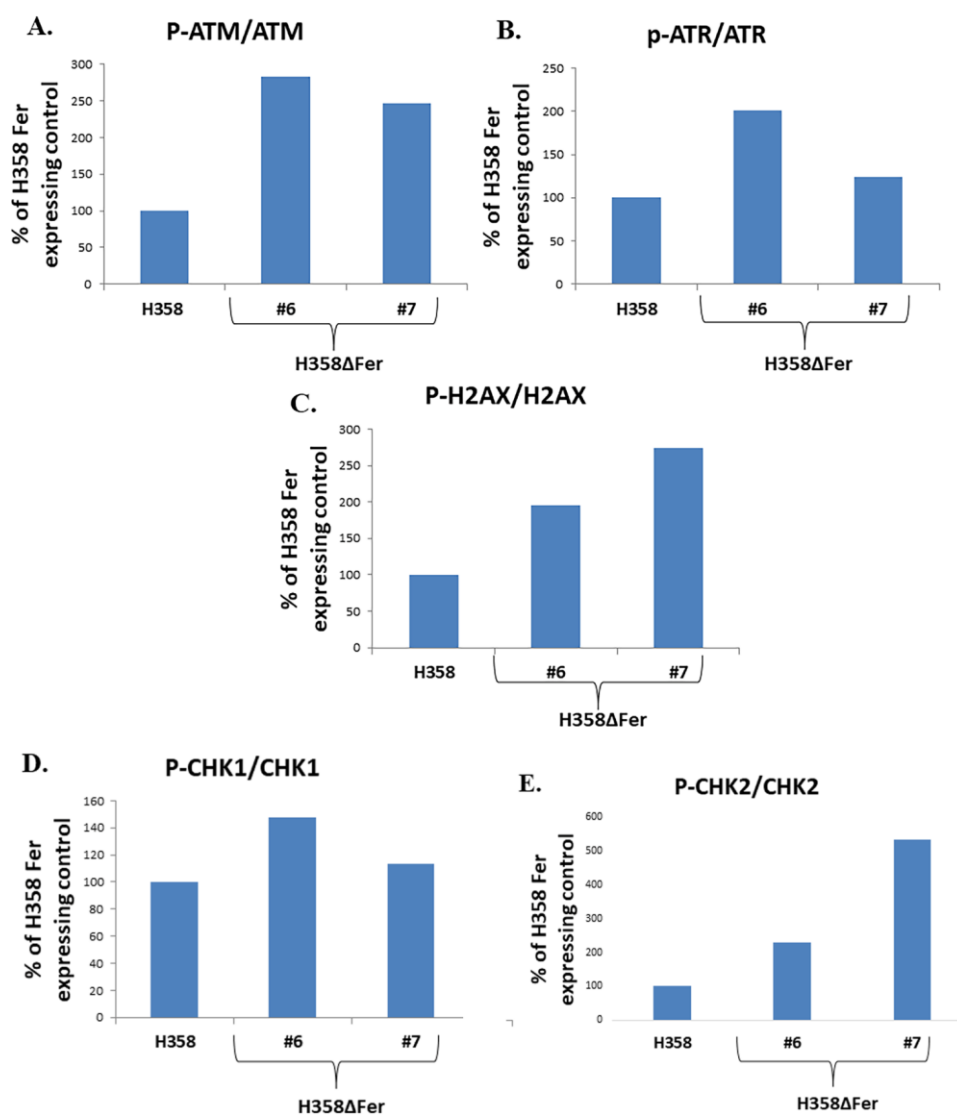

**Figure S1 . Presentation of phospho/pan ratio of the checked DDR proteins in H358 and H358ΔFer cells.** [A] P-ATM/ATM, [B] P-ATR/ATR, [C] P-H2AX/H2AX, [D] P-CHK1/CHK1, and [E] P-CHK2/CHK2. These results represent one out of three independent experiments which gave similar results.

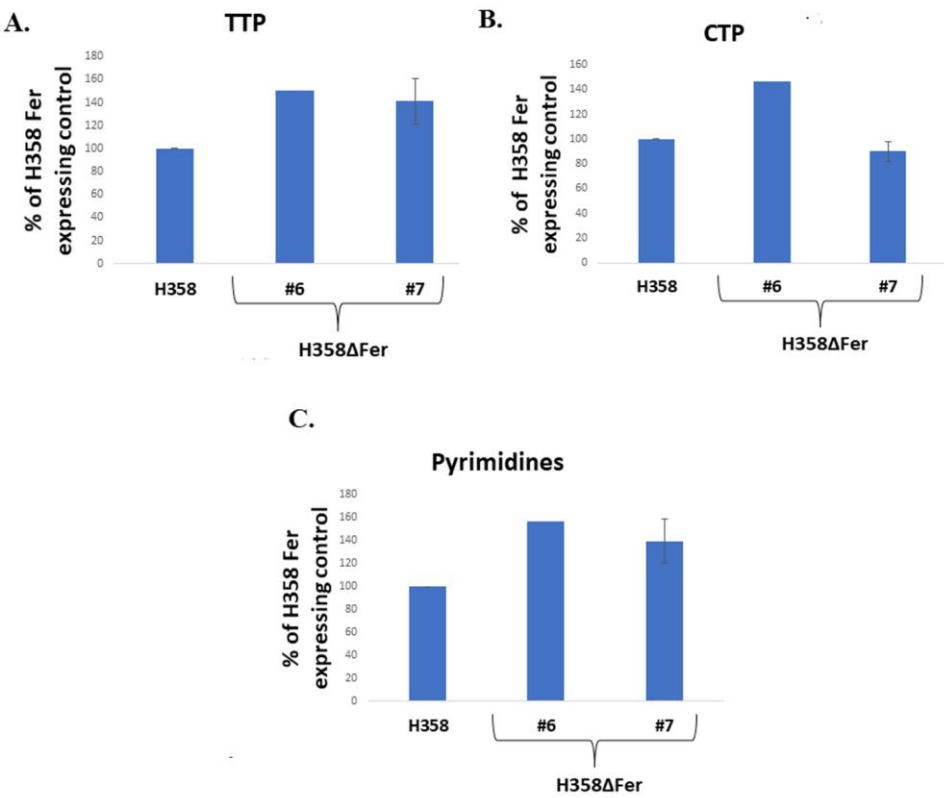

**Figure S2.S1.** similar pyrimidine levels in H358 and H358ΔFer cells. [A] LC-MS analysis of TTP, and [B] CTP in H358 and H358ΔFer cells, grown in the absence of glucose. [C] Total TTP+CTP levels.

7

8  
9  
10

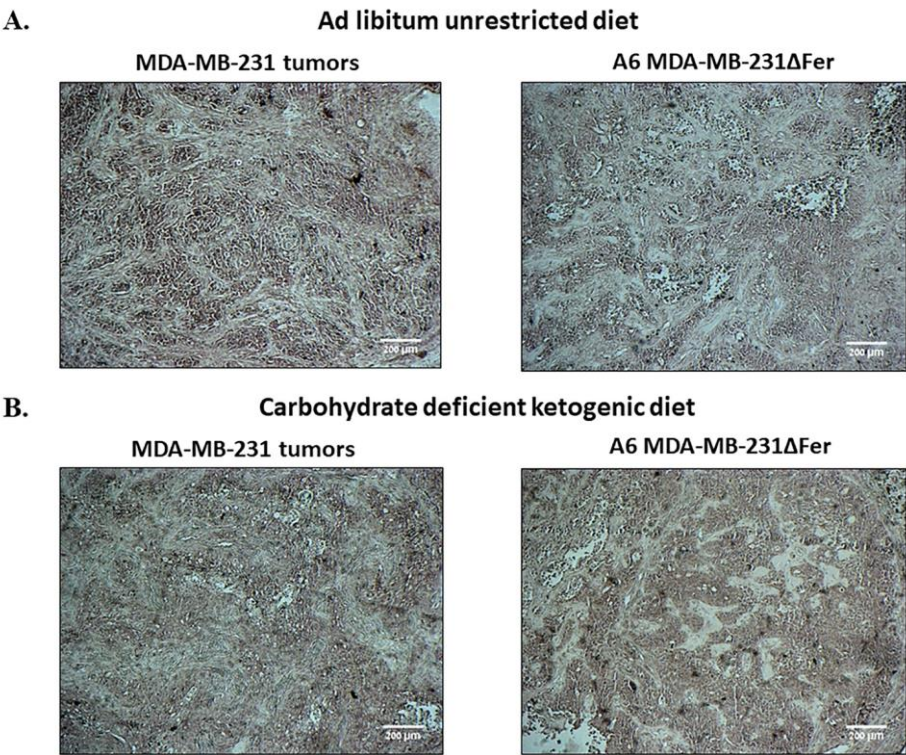

Figure S3 . Hematoxylin and eosin staining of MDA-MB-231, and MDA-MB-231ΔFer (clone A6) sections, derived from tumors in mice fed with [A] ad libitum un-restricted diet, or [B] a carbohydrate deficient ketogenic diet. Scale Bar: 200 μm.

11  
12  
13  
14  
15  
16
